# Supplementary material for: One-step synthesis of a robust, ultrathin, stretchable antifogging copolymer film
Source: Royal Society of Chemistry journal article supplement (doi:10.1039/d2tc04838h), 2023-01-01
Supplement: d2tc04838h4.pdf [file d2tc04838h4.pdf]

## Electronic supplementary Information

### **One-step synthesis of a robust, ultrathin, stretchable antifogging copolymer film**

*Jin Ryu,<sup>‡,a</sup> Myung Seok Oh,<sup>‡,b</sup> Jongsun Yoon,<sup>‡,c</sup> Minjeong Kang,<sup>a</sup> Jae Bem You,<sup>d</sup> Hyomin Lee,<sup>c,\*</sup>*

*Sung Gap Im<sup>a,\*</sup>*

<sup>a</sup>Department of Chemical and Biomolecular Engineering, Korea Advanced Institute of Science and Technology (KAIST), Daejeon, 34141, Republic of Korea

<sup>b</sup>Interface Materials and Chemical Engineering Research Center, Korea Research Institute of Chemical Technology (KRICT), Daejeon, 34141, Republic of Korea

<sup>c</sup> Department of Chemical Engineering, Pohang University of Science and Technology (POSTECH), Pohang, 37673, Republic of Korea

<sup>d</sup> Department of Chemical Engineering, Kyungpook National University, Daegu, 41566, Republic of Korea

<sup>‡</sup> These authors contributed equally to this work.

\* Correspondence to: [hyomin@postech.ac.kr](mailto:hyomin@postech.ac.kr), [sgim@kaist.ac.kr](mailto:sgim@kaist.ac.kr)

**Movie S1.** Stretchable characteristic of synthesized pH8V1 copolymer via iCVD

**Movie S2.** Anti-fogging test in stretched test

**Movie S3.** Self-cleaning performance of pH8V1 film deposited slide glass.

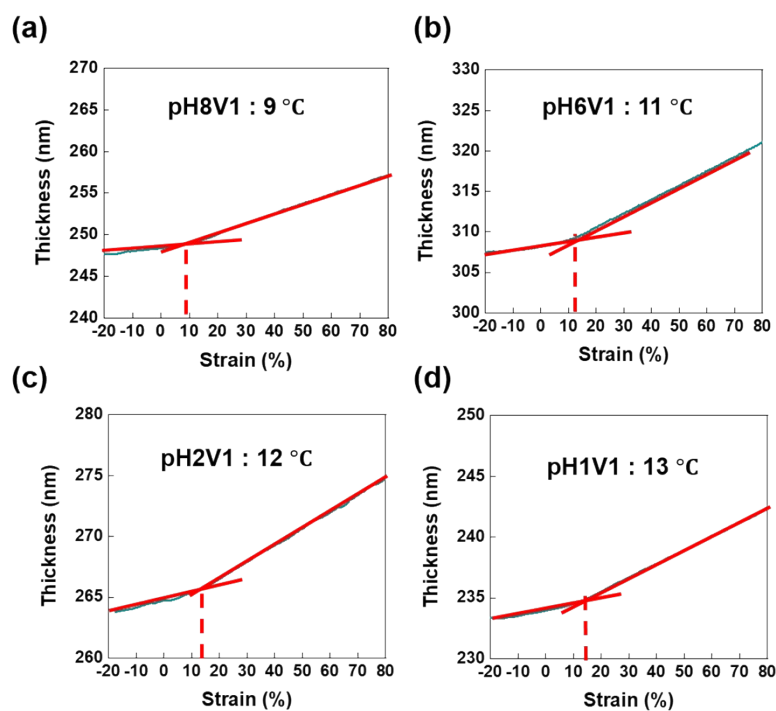

**Figure S1.** Ellipsometry measurements of pH8V1, pH6V1, pH2V1, pH1V1 for measuring the  $T_g$  of the copolymer film

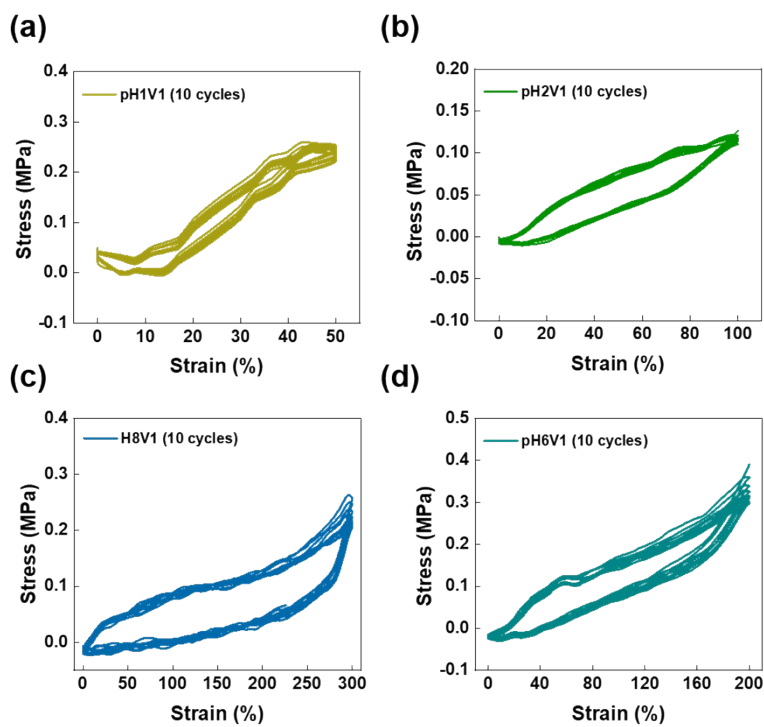

Figure S2. Cyclic S-S curve (a) pH1V1, (b) pH2V1, (c) pH6V1, (d) pH8V1 .

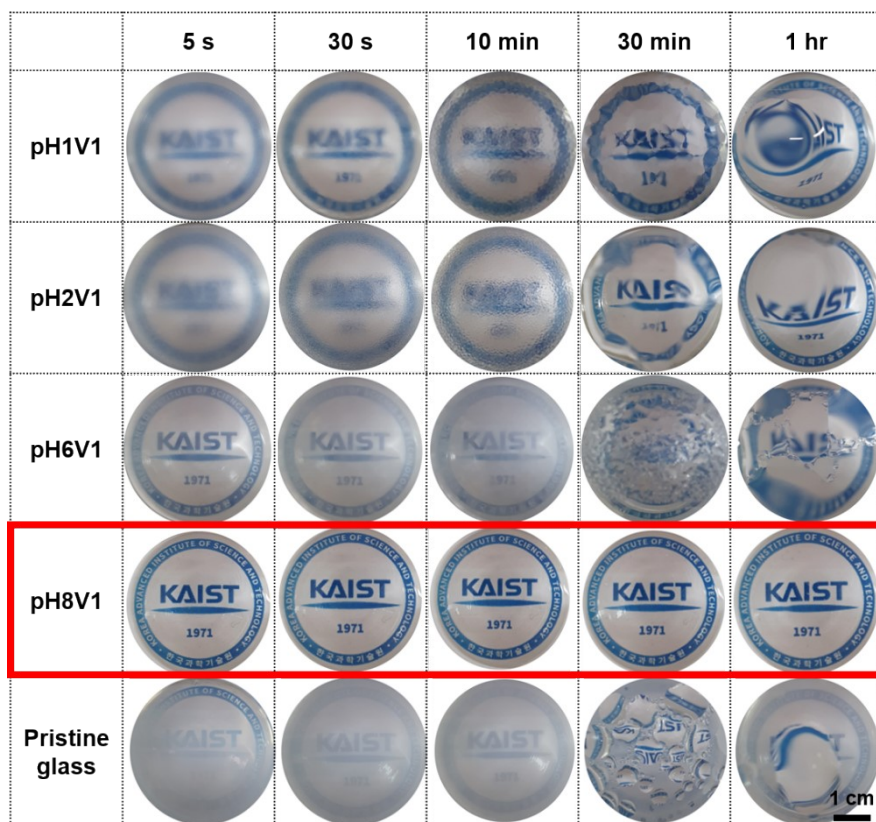

Figure S3. Comparison of antifogging performance of pHV series during 1 hr

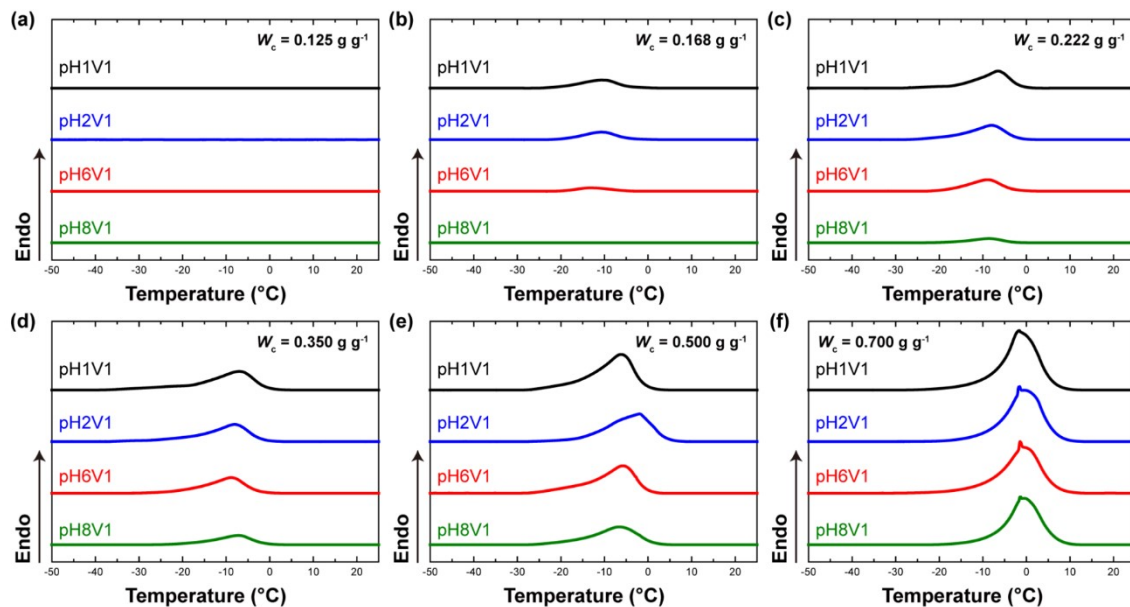

**Figure S4.** DSC analysis for measurement of water absorption.

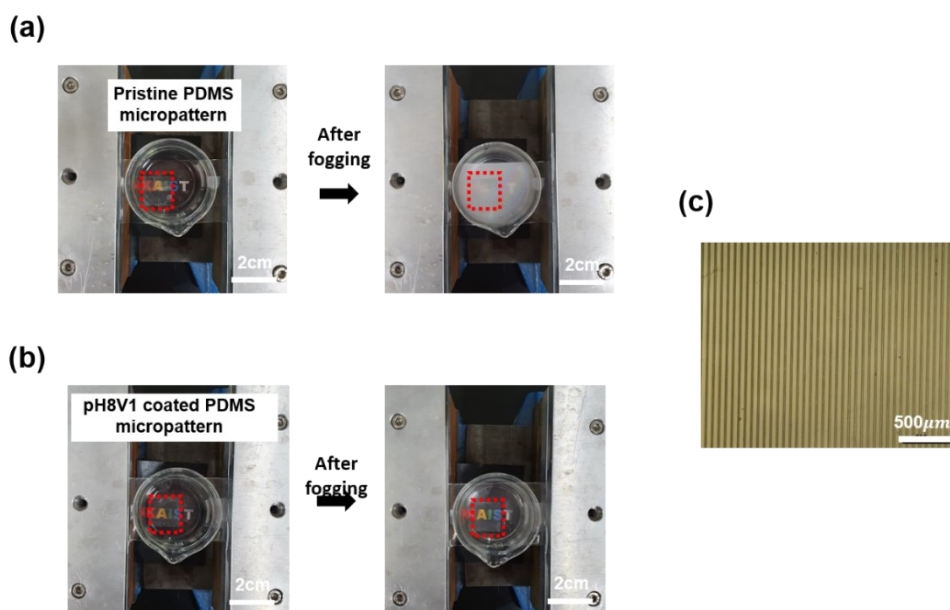

**Figure S5.** Optical photographs with (a) bare PDMS micropattern and (b) pH8V1 deposited PDMS micropattern placed 3 cm away from water heated to 80°C, at ambient conditions (25°C, 22%RH) before and after 50% stretching. The camera was fixed at the same position and pictures were taken at 5 s (c) Optical microscope image of the pH8V1 deposited PDMS micropattern

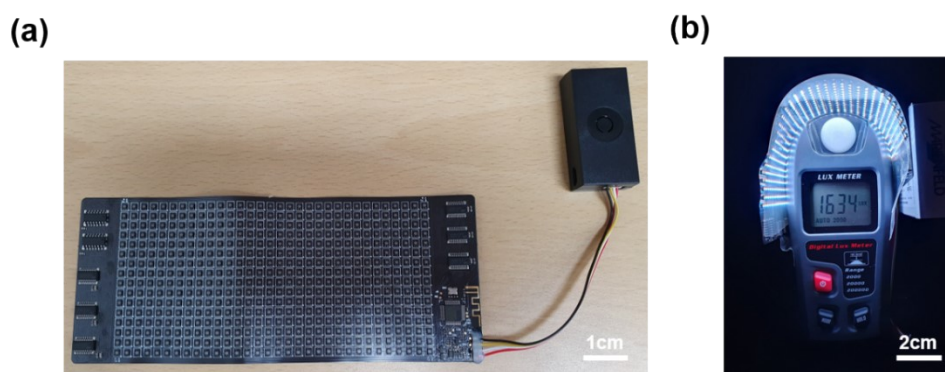

**Figure S6.** (a) Optical image of flexible LED display (b) Optical image of illuminometer and flexible LED display. The light intensity of the display was measured in a dark room. The experiment was carried out with the display wrapped around the illuminometer

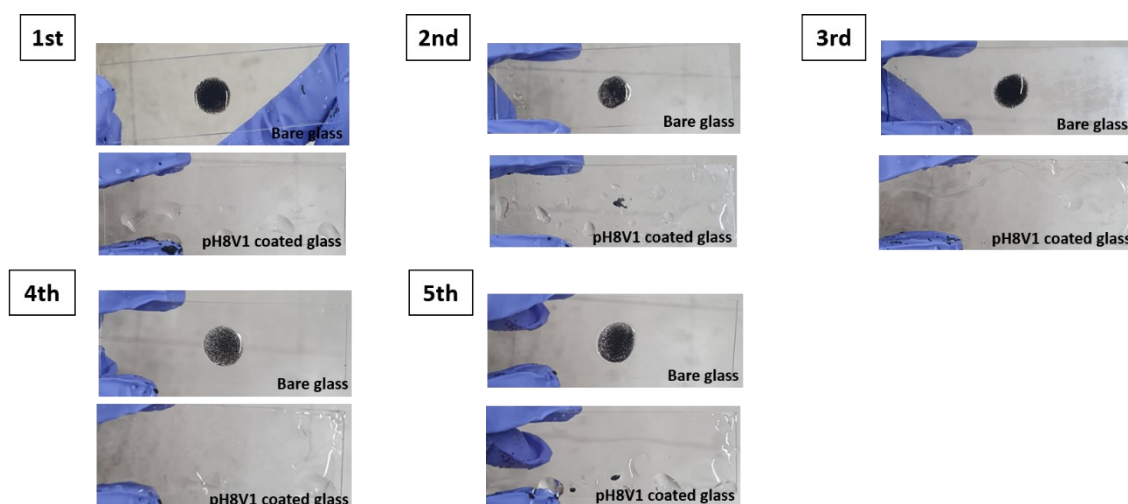

**Figure S7.** Self-cleaning property of bare slide glass (Top) and the pH8V1 coated slide glass (bottom) after washing with water. This repeats 5 times with the same samples. The contamination is a mixture of activated carbon and silicone oil.

|                | Si wafer                                                                          | Glass                                                                             | PEN                                                                               | PET                                                                                | PS                                                                                  |
|----------------|-----------------------------------------------------------------------------------|-----------------------------------------------------------------------------------|-----------------------------------------------------------------------------------|------------------------------------------------------------------------------------|-------------------------------------------------------------------------------------|
| Before Coating |  |  |  |  |  |
|                | 56°                                                                               | 30°                                                                               | 67°                                                                               | 65°                                                                                | 72°                                                                                 |
| After Coating  |  |  |  |  |  |
|                | 17°                                                                               | 9°                                                                                | 12°                                                                               | 11°                                                                                | 13°                                                                                 |

\* PEN : Polyethylene naphthalate  
\* PET : Polyethylene Terephthalate  
\* PS : Polystyrene

**Figure S8.** Deposited pHV films on any arbitrary surfaces (Glass, PEN and PET)
